# Supplementary material
Source: publisher site journal article supplement (https://www.spandidos-publications.com/892/downloadSupplementary)
Supplement: Supplementary file 1 [file downloadSupplementary]

## Supplementary file 1: Quantitative RT-PCR of mature microRNAs

MicroRNAs were quantified using TaqMan® MicroRNA Assays (ThermoFisher Scientific, Inc.) with modifications. Briefly, 10 ng of total RNA was reverse transcribed (RT) by TaqMan® MicroRNA RT kit. 1.5  $\mu$ l of RT reactions contained 10xRT buffer, 0.15  $\mu$ l of 100 mM dNTPs with dTTP, 0.19  $\mu$ l of RNase-inhibitor (20 unit/ $\mu$ l), 1  $\mu$ l of MultiScribe™ Reverse Transcriptase (50 units/ $\mu$ l), 1  $\mu$ l of each of microRNA specific stem-loop primers (has-miR-101, cat. no. 000438; ath-miR-159, cat. no. 000338; ThermoFisher Scientific, Inc.) and 10  $\mu$ l of input RNA. The mixture was incubated at 16°C for 30 min,

42°C for 30 min and 85°C for 5 min subsequently, quantitative real time-PCR was performed using an ABI Prism 7900 sequence detection system (Applied Biosystems). For a 20  $\mu$ l of PCR reaction, 1  $\mu$ l of 20xTaqMan® MicroRNA Assays in which PCR primers and probes (5'-FAM and 3'-MGB) were contained, 1  $\mu$ l of RT product and 10  $\mu$ l of 2xTaqMan® Universal Master mix, No AmpErase® UNG (ThermoFisher Scientific, Inc.) were mixed. The reaction was first incubated at 95°C for 2 min, followed by 50 cycles of 95°C for 15 sec and 60°C for 1 min.

Figure S1. Extracellular vesicle miR expression derived from BM-MSCs using TaqMan miRNA low-density array (Thermo Fisher Scientific, Inc.). In addition to miR-101 and miR-15b, a total of 7 EV-miRs (miR-375, miR-424, miR-548c-3p, miR-485-3p, miR-579, miR-195 and miR-369-3p) derived from BM-MSCs indicated a significant difference between low-risk MDS group (Low) and high-risk MDS group (High). However, these 7 miRs failed to exhibit any consistent pattern. miR, microRNA; BM-MSCs, bone marrow mesenchymal stromal cells; MDS, myelodysplastic syndrome.

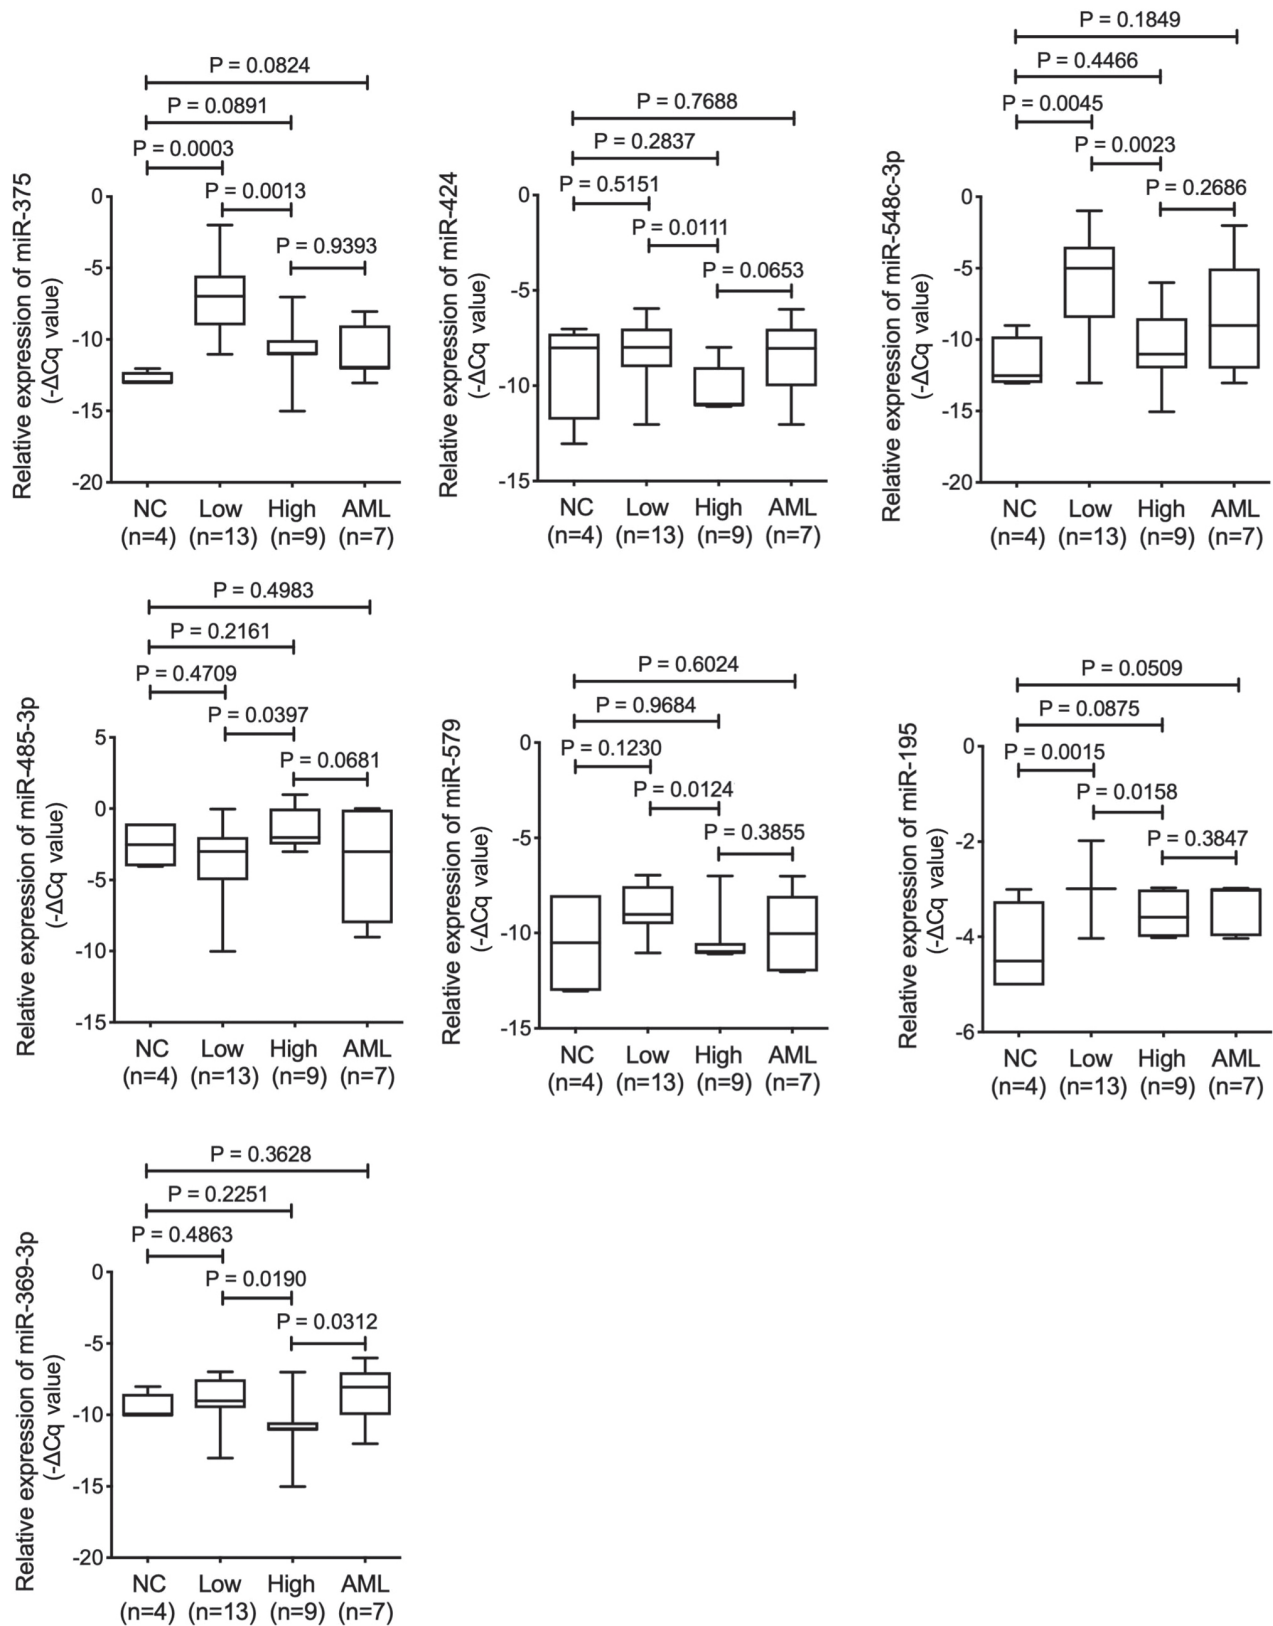

Table SI. List of the miR-101 target genes used for the gene ontology analysis.

| Genes          |       |        |        |
|----------------|-------|--------|--------|
| APP            | EED   | MYCN   | SOX9   |
| ARID1A         | EYA1  | NLK    | SRF    |
| ATG4D          | EZH2  | NOTCH1 | STMN1  |
| ATM            | FBN2  | PIK3CB | SUZ12  |
| ATP5B          | FMR1  | PIM1   | TET2   |
| ATXN1          | FOS   | PRDM1  | TGFBR1 |
| CCDC88A        | GRSF1 | PRKDC  | TLR2   |
| CCND1          | ITGA3 | PTGER4 | VEGFA  |
| CDH5           | JAK2  | PTGS2  | VEGFC  |
| CDK8           | KLF6  | RAB1A  | VHL    |
| CFTR           | MCL1  | RAB5A  | ZEB1   |
| CPEB1          | MEIS1 | RAC1   | ZEB2   |
| CTNNB1         | MET   | RAP1B  |        |
| DNMT3A         | MITF  | RUNX1  |        |
| DUSP1          | MTOR  | SNHG1  |        |
| miR, microRNA. |       |        |        |
